# Supplementary material for: Mg alloy surface immobilised with caerin peptides acquires enhanced antibacterial ability and improved corrosion resistance
Source: Research Square preprint supplement (doi:10.21203/rs.3.rs-92270/v1), 2020-10-14
Supplement: Supplementary file 1 [file c1213620a47246912036cda6.docx]

Figure S2. Antibacterial circle images of different materials within 100 hours

| Time  Controls | 24 hours | 48hours | 72hours | 100 hours |
| --- | --- | --- | --- | --- |
| F3 | 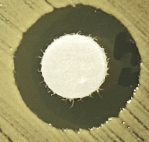 | 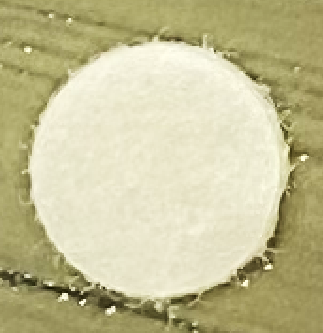 | 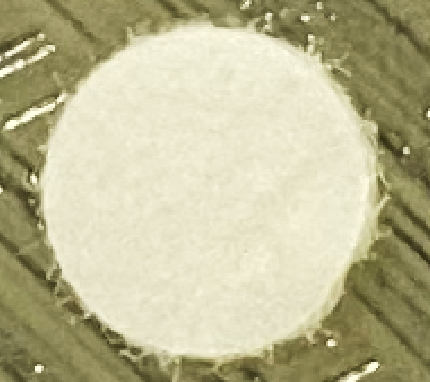 | 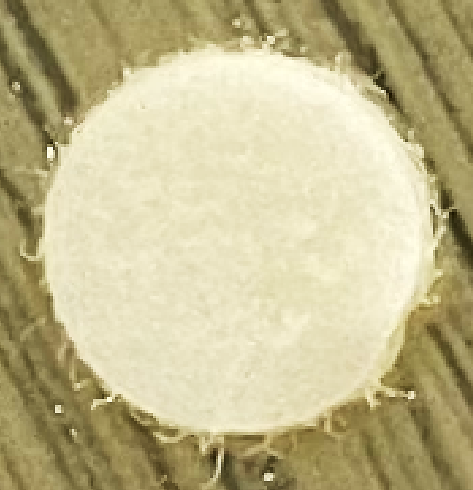 |
| F1 | 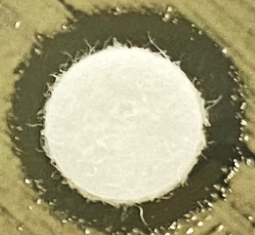 | 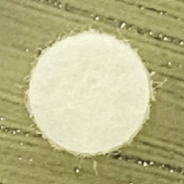 | 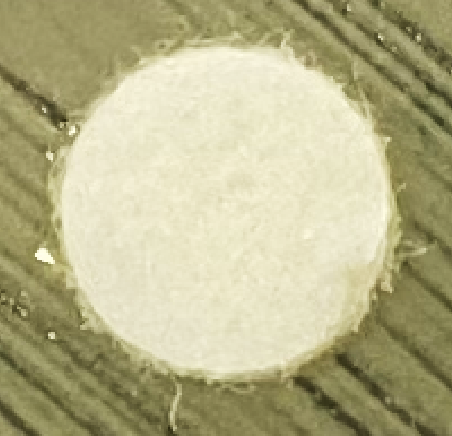 | 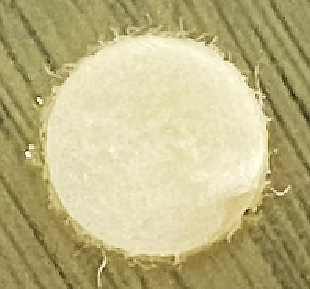 |
| BASD | 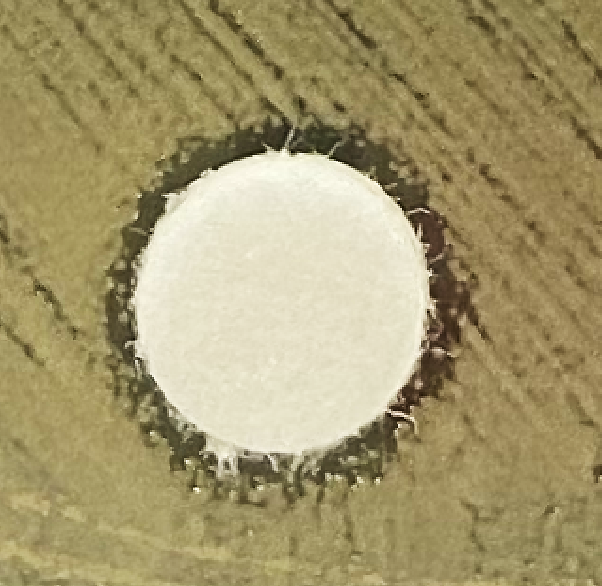 | 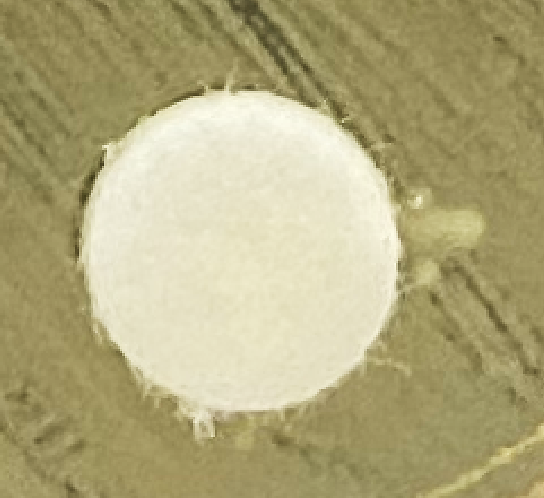 | 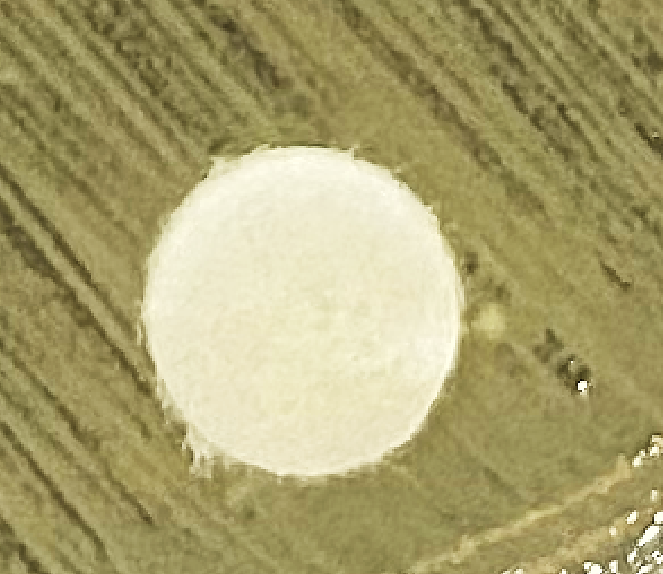 | 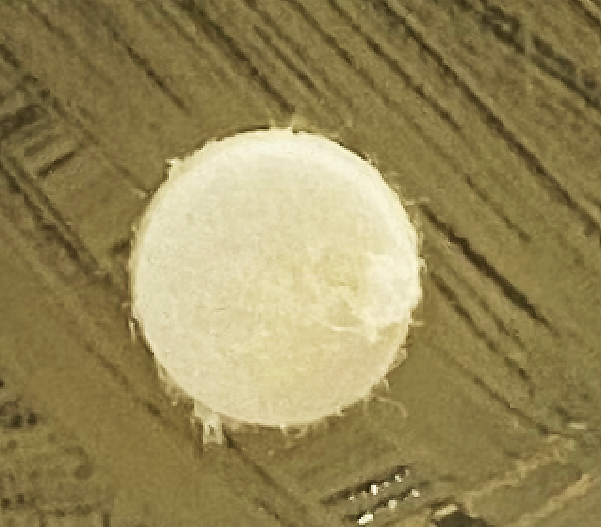 |
| Tazocin+BASD | 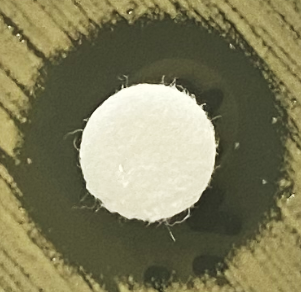 | 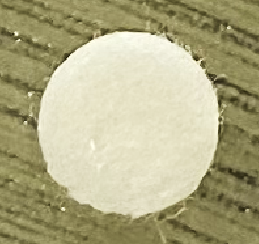 | 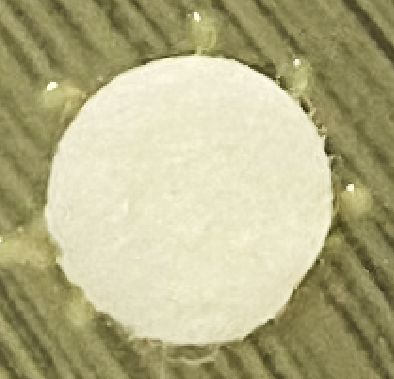 | 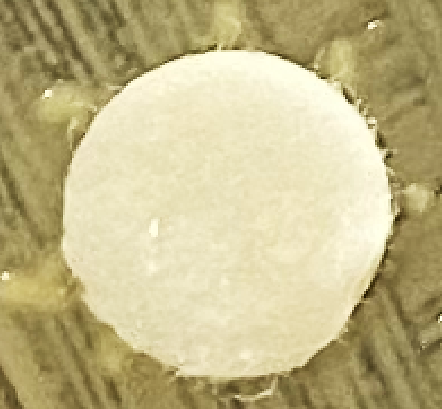 |
| Extruded AZ31 | 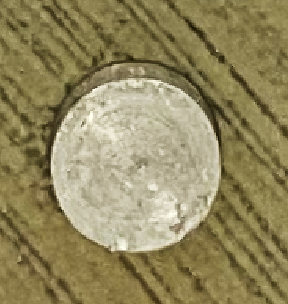 | 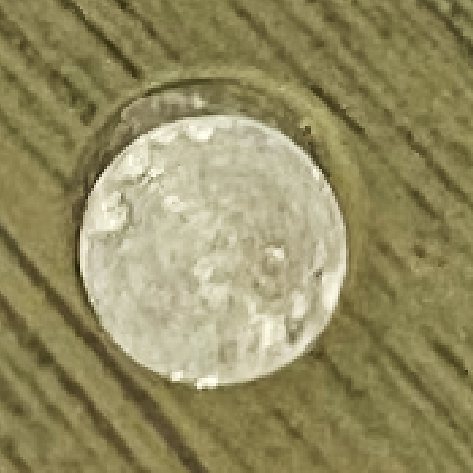 | 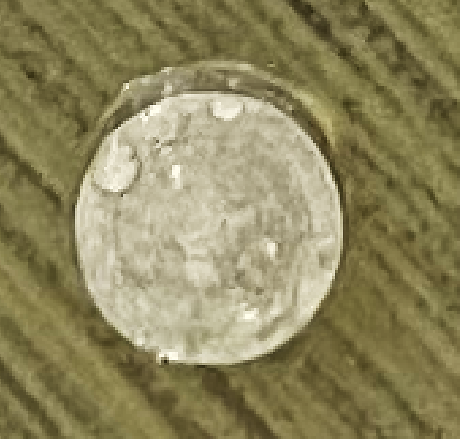 | 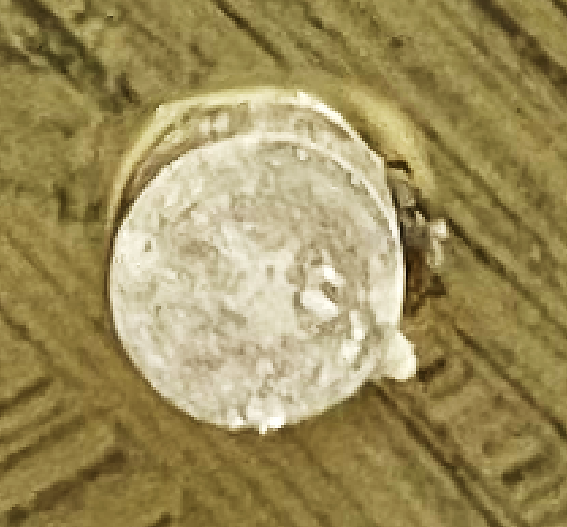 |
| Extruded AZ31 with 30g F1 coating | 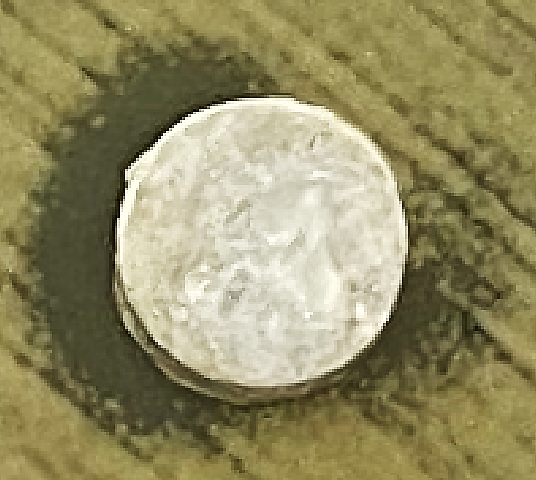 | 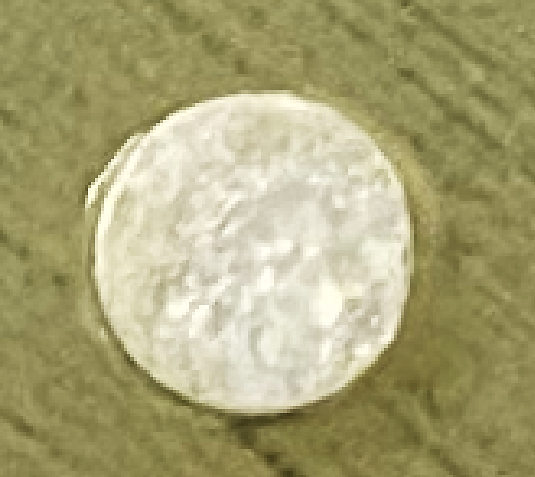 | 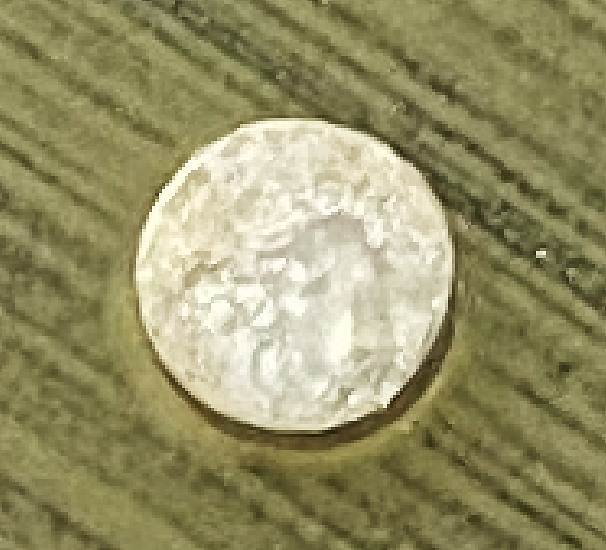 | 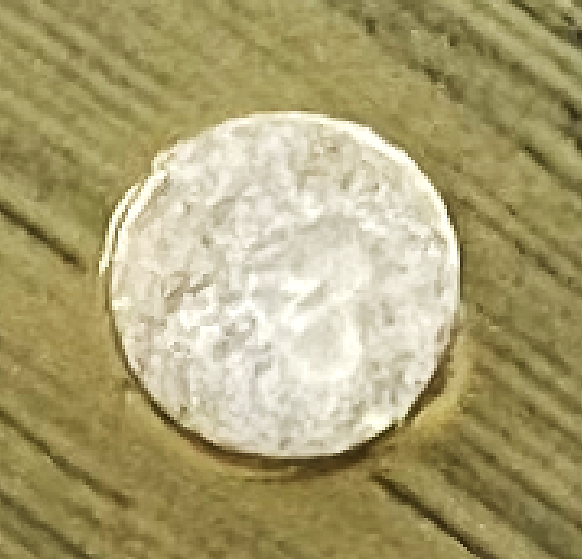 |
| Extruded AZ31 with 30g F3 coating | 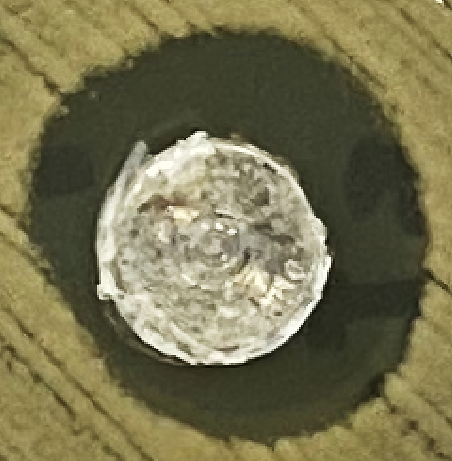 | 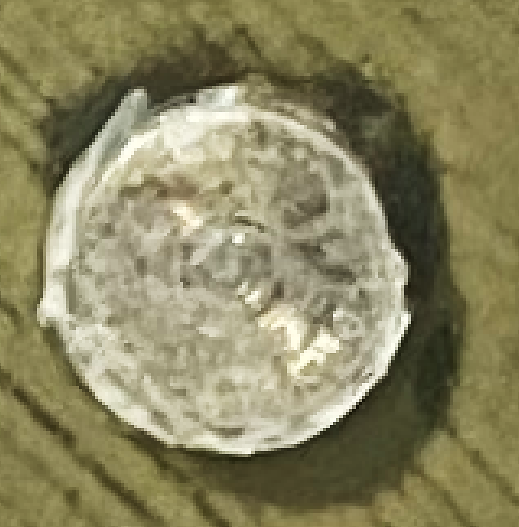 | 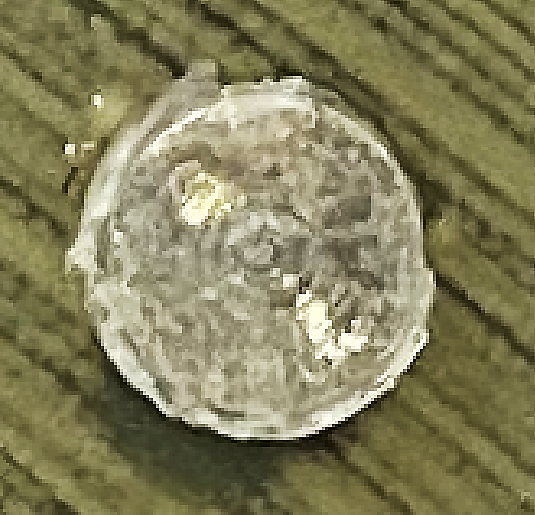 | 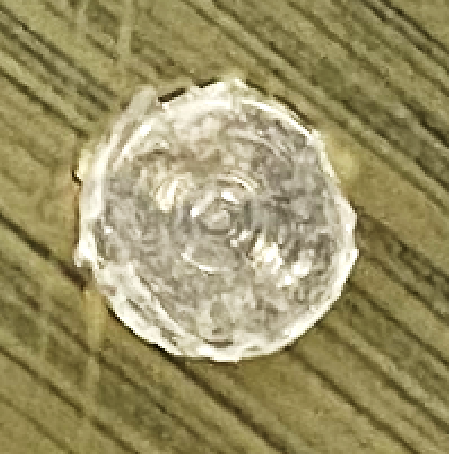 |
| Annealed AZ31 | 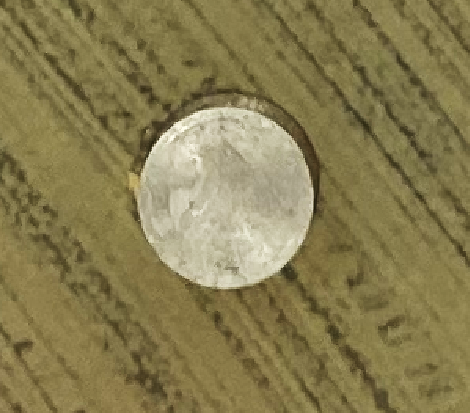 | 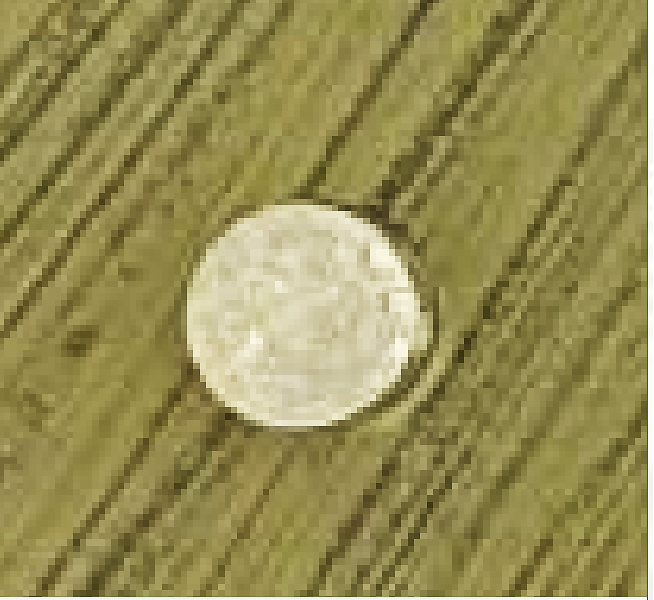 | 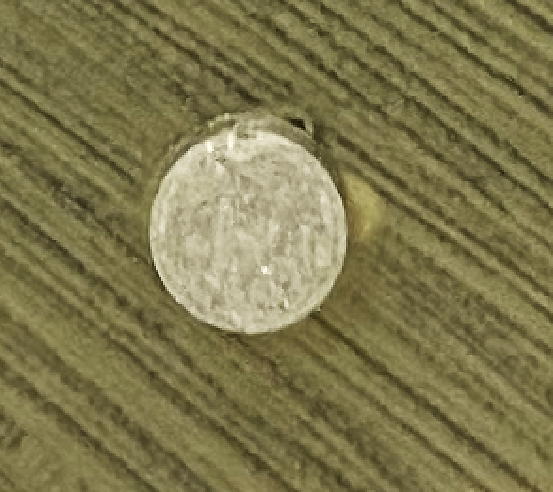 | 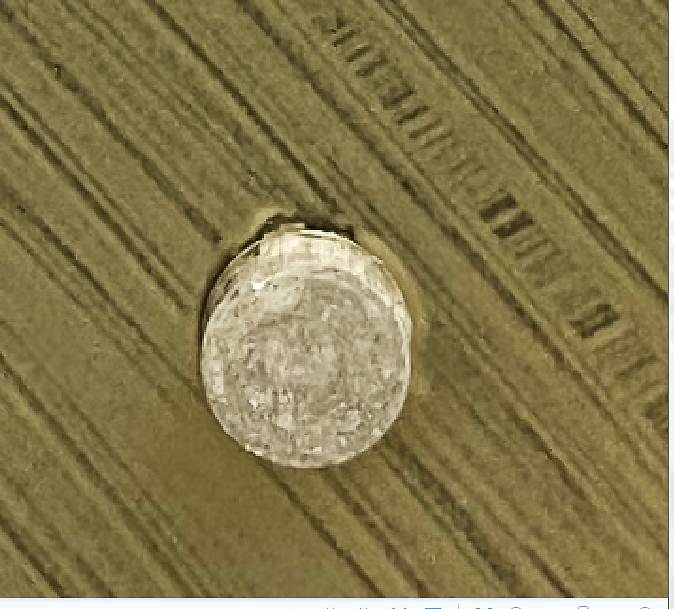 |
| Annealed AZ31 with 30g F1 Coating | 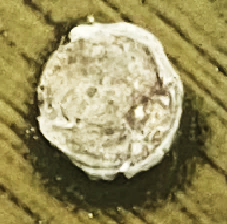 | 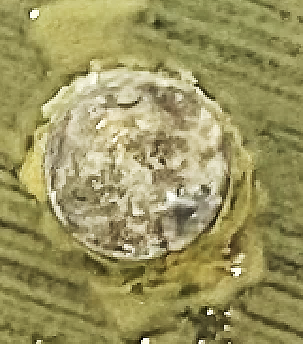 | 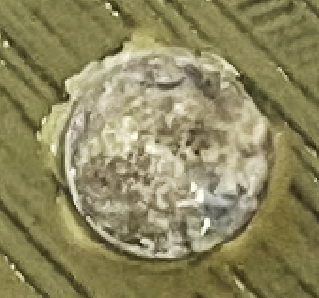 | 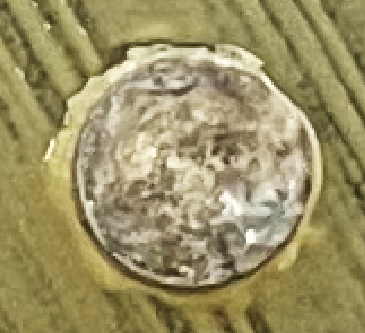 |
| AZ31Annealed AZ31 with 30g F3 Coating | 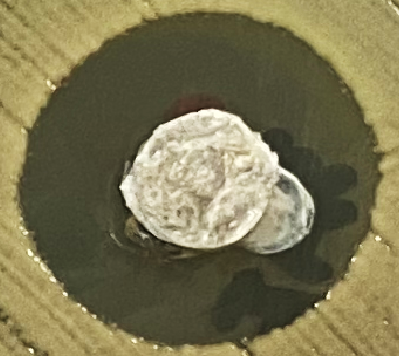 | 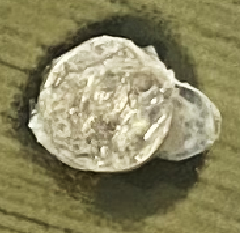 | 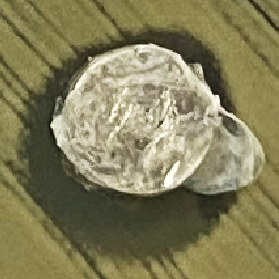 | 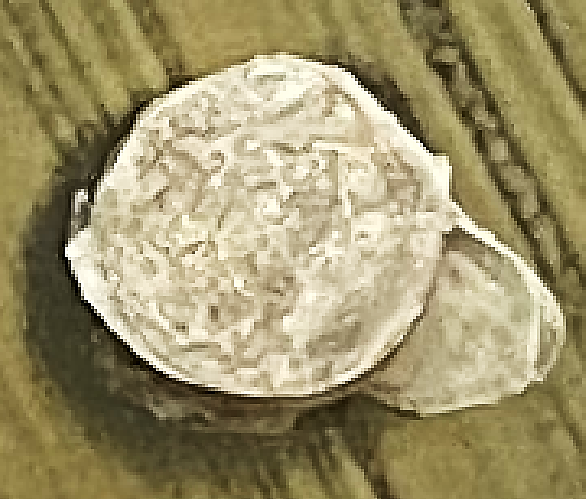 |
| Polyurethane coat only | 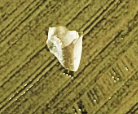 | 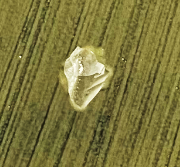 | 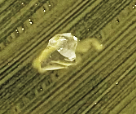 | 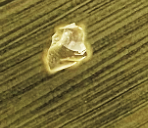 |
