# Supplementary material for: Mg alloy surface immobilised with caerin peptides acquires enhanced antibacterial ability and improved corrosion resistance
Source: Research Square preprint supplement (doi:10.21203/rs.3.rs-92270/v1), 2020-10-14
Supplement: Supplementary file 2 [file d1e356e5814adfe8cfd52f08.xlsx]

## Sheet: Sheet1
Corrosion time (hr)	0	0.5	2	6	12	24	48	96	120
(Weight/pH value)
Extruded AZ31	55.75/7.20	55.79/7.73	55.60/7.97	56.01/8.56	56.04/8.60	55.88/8.71	55.79/8.6	55.46/7.16	55.40/7.15
Extruded AZ31 (F1 coating)	55.38/7.20	56.12/7.66	54.80/8.03	54.94/8.38	54.87/8.50	54.65/6.50	54.70/7.88	54.75/7.31	54.74/7.77
Extruded AZ31 (F3 coating)	54.36/7.20	54.38/7.64	53.90/8.05	54.43/8.31	54.48/8.49	54.41/8.54	54.36/8.47	54.23/6.78	54.21/7.95
Annealed AZ31	58.21/7.20	58.93/7.80	58.50/8.30	58.18/8.44	58.29/8.67	58.44/8.86	58.21/8.78	58.09/8.92	58.06/8.91
Annealed AZ31 (F1 coating)	56.59/7.20	56.40/7.63	55.70/8.17	55.84/8.28	56.00/8.53	56.02/8.54	56.00/8.50	56.06/8.42	55.71/6.78
Annealed AZ31 (F3 coating)	59.37/7.20	58.66/7.64	58.20/8.11	58.08/8.29	58.26/8.40	58.31/8.50	58.23/8.46	58.38/8.66	58.29/8.31

## Sheet: Sheet2
Diameter of antibacterial circle (mm)	0 hour	24 hours	48 hours	72 hours	100 hours
F1	7.47	9.24	7.47	7.47	7.47
F3	7.47	12.4	7.47	7.47	7.47
BASD	7.47	7.47	7.47	7.47	7.47
30mg Tazocin+ BASD	7.47	12.72	7.47	7.47	7.47
Extruded AZ31	4.4	4.4	4.4	4.4	4.4
Extruded AZ31 with 30mg F1 coating	4.4	6.1	4.4	4.4	4.4
Extruded AZ31 with 30mg F3 coating	4.4	9.83	7.73	6.88	5.05
Annealed AZ31	4.4	4.4	4.4	4.4	4.4
Annealed AZ31 with 30mg F1 Coating	4.4	7.39	4.4	4.4	4.4
AZ31Annealed AZ31 with 30mg F3 Coating	4.4	11.91	7.82	7.03	6.08
