# Supplementary material for: Mg alloy surface immobilised with caerin peptides acquires enhanced antibacterial ability and improved corrosion resistance
Source: Research Square preprint supplement (doi:10.21203/rs.3.rs-92270/v1), 2020-10-14
Supplement: Supplementary file 3 [file e472ca78d02d56b75f369e9f.xlsx]

## Sheet: Sheet1
Standards	A	B	C	D	E	F	G	H	I
OD values	1.2381	1.032	0.7381	0.6025	0.4398	0.266	0.1913	0.1189	0.1033
	1.2631	1.0239	0.7626	0.5735	0.465	0.2516	0.1931	0.1183	0.1029
Average	1.2506	1.02795	0.75035	0.588	0.4524	0.2588	0.1922	0.1186	0.1031
Concentration (ug/ml)	2000	1500	1000	750	500	250	125	25	0
Peptide concentration of the reaction tube post immobilisation step
10x dilution	1E-F1	1E-F3	AP-F1	AP-F3	AZ31-F1	AZ31-F3
OD values	0.306367	0.247433	0.2811	0.256367	0.282433	0.252733
Concentration of diluted solution (ug/ml)	341.246	235.756	296.019	251.746	298.406	245.243
Final concentration (ug/ml)	3412.46	2357.56	2960.19	2517.46	2984.06	2452.43
Peptide concentration of 10ml MilliQ water
no dilution	1E-F1	1E-F3	AP-F1	AP-F3	AZ31-F1	AZ31-F3
OD values	0.131734	0.129244	0.130667	0.129622	0.130723	0.129468
Final concentration (ug/ml)	13.6499	9.43023	11.8408	10.0699	11.9362	9.80971
	1E-F1	1E-F3	AP-F1	AP-F3	AZ31-F1	AZ31-F3
mt (mg)	5.00062	4.27876	5.00062	4.27876	5.00062	4.27876
ml (mg)	1.56973	1.08448	1.36169	1.15803	1.37267	1.12812
mw (mg)	0.136499	0.0943023	0.118408	0.100699	0.119362	0.0980971
S (mm2) (incl. the thickness of PU coating)	52.8794	52.8794	52.8794	52.8794	52.8794	52.8794
Coverage (nmol/mm2)	5.13912	5.6517	5.49189	5.50593	5.47327	5.56522
S=2A1+A2
where, h0 is the thickness of original specimen, mm; h is the thickness of coating, mm
